# Supplementary material
Source: Springer Nature journal article supplement (https://www.springermedizin.de/resource/supplementary/13054_2009_7422_MOESM4_ESM.pdf/9729690)

# Implementation flow chart

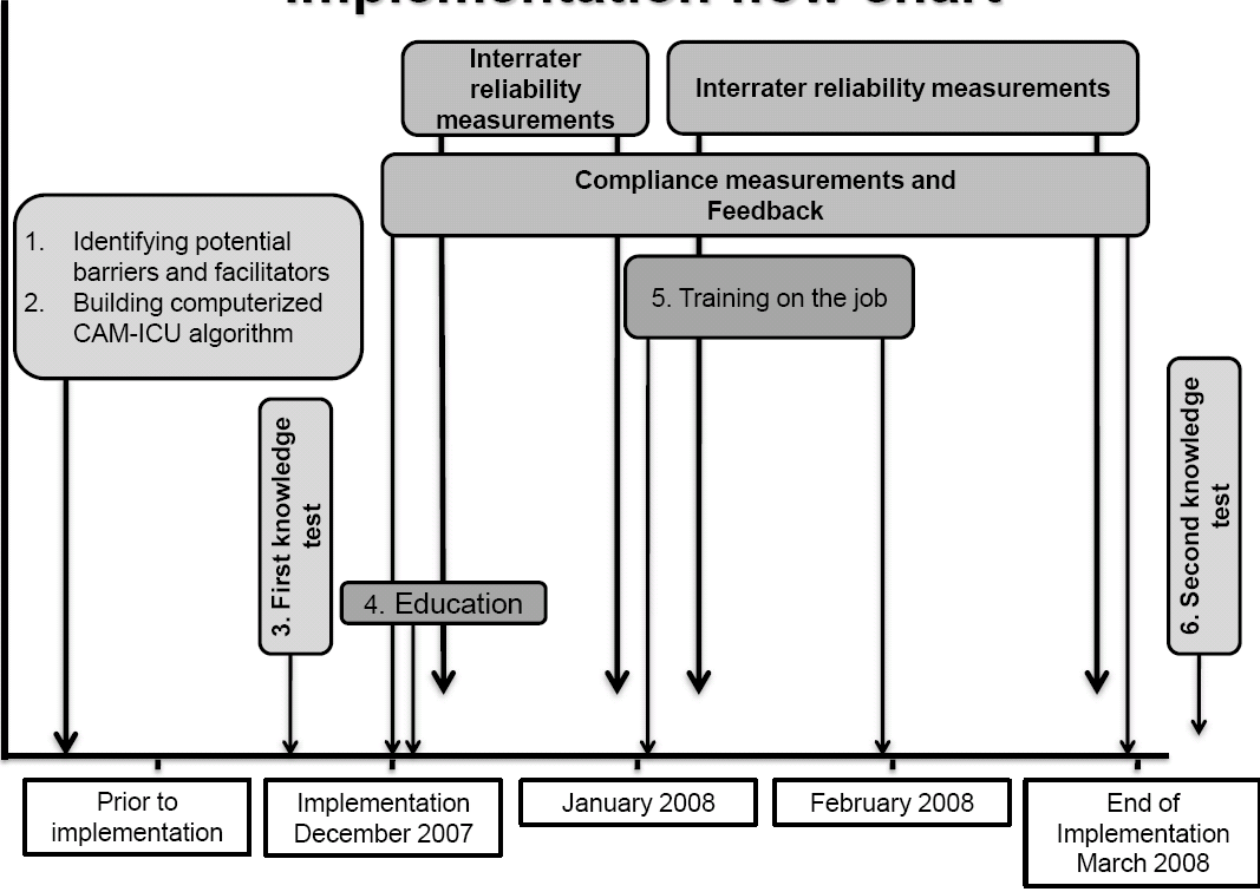

Supplement: MOESM4 [file 9729690]
